# Supplementary material for: Genome-Wide Identification, and In-Silico Expression Analysis of YABBY Gene Family in Response to Biotic and Abiotic Stresses in Potato (Solanum tuberosum)
Source: MDPI journal article supplement (doi:10.3390/genes14040824), 2023-03-29
Supplement: s1 [file s1]

**Table S1:**

Putative Cis-regulatory elements found in promoter regions of *StYAB* genes.

| Gene Id       | Start-Seq | End-seq | Cis-Elements    | Function                                                            |
|---------------|-----------|---------|-----------------|---------------------------------------------------------------------|
| <i>StYAB1</i> | 447       | 438     | I-box           | Part of light responsive element                                    |
| <i>StYAB1</i> | 682       | 675     | MRE             | MYB binding site involved in light responsive elements              |
| <i>StYAB1</i> | 449       | 439     | GATA-motif      | Part of light responsive element                                    |
| <i>StYAB1</i> | 89        | 95      | MYC             | Activates expression of proliferative genes                         |
| <i>StYAB1</i> | 853       | 848     | STRE            | Stress related function                                             |
| <i>StYAB2</i> | 42        | 37      | STRE            | Stress related function                                             |
| <i>StYAB2</i> | 78        | 84      | MYC             | Activates expression of proliferative genes                         |
| <i>StYAB2</i> | 173       | 179     | GT1-motif       | light responsive element                                            |
| <i>StYAB2</i> | 791       | 797     | ABRE3a          | Positive regulator of abiotic stress and ABA signaling              |
| <i>StYAB2</i> | 899       | 893     | ARE             | cis-acting regulatory element essential for the anaerobic induction |
| <i>StYAB2</i> | 663       | 672     | I-box           | Part of light responsive element                                    |
| <i>StYAB2</i> | 680       | 674     | MYB             | Plant Development                                                   |
| <i>StYAB2</i> | 461       | 470     | WUN-motif       | A defense and stress responsive element                             |
| <i>StYAB2</i> | 234       | 244     | AT-rich element | Binding site of AT-rich DNA binding protein (ATBP-1)                |
| <i>StYAB2</i> | 226       | 232     | Box 4           | Part of a conserved DNA module involved in light responsiveness     |
| <i>StYAB2</i> | 792       | 797     | ABRE            | Cis-acting element involved in the abscisic acid responsiveness     |
| <i>StYAB2</i> | 791       | 785     | ABRE 4          | Mediate ABA-dependent stress responses.                             |
| <i>StYAB2</i> | 674       | 667     | MRE             | MYB binding site involved in light responsive elements              |
| <i>StYAB3</i> | 521       | 528     | AAGAA-motif     | cis-acting regulatory element                                       |
| <i>StYAB3</i> | 583       | 589     | ARE             | cis-acting regulatory element essential for the anaerobic           |

|               |      |      |             | induction                                                           |
|---------------|------|------|-------------|---------------------------------------------------------------------|
| <i>StYAB3</i> | 835  | 829  | Box 4       | part of a conserved DNA module involved in light responsiveness     |
| <i>StYAB3</i> | 763  | 753  | CAG-motif   | part of a light response element                                    |
| <i>StYAB3</i> | 640  | 646  | GT1-motif   | light responsive element                                            |
| <i>StYAB3</i> | 199  | 193  | LTR         | cis-acting element involved in low-temperature responsiveness       |
| <i>StYAB3</i> | 799  | 805  | MYB         | Plant Development                                                   |
| <i>StYAB3</i> | 899  | 905  | MYC         | Activates expression of proliferative genes                         |
| <i>StYAB3</i> | 727  | 721  | TGA-Element | Auxin-responsive element                                            |
| <i>StYAB3</i> | 176  | 185  | Circadian   | cis-acting regulatory element involved in circadian control         |
| <i>StYAB4</i> | 565  | 572  | AAGAA-motif | cis-acting regulatory element                                       |
| <i>StYAB4</i> | 531  | 537  | ABRE        | Cis-acting element involved in the abscisic acid responsiveness     |
| <i>StYAB4</i> | 953  | 961  | AE-box      | part of a module for light response                                 |
| <i>StYAB4</i> | 410  | 416  | ARE         | cis-acting regulatory element essential for the anaerobic induction |
| <i>StYAB4</i> | 768  | 758  | GATA-motif  | Part of light responsive element                                    |
| <i>StYAB4</i> | 1100 | 1107 | GCN4-motif  | cis-regulatory element involved in endosperm expression             |
| <i>StYAB4</i> | 221  | 211  | I-box       | Part of light responsive element                                    |
| <i>StYAB4</i> | 576  | 582  | MYB         | Plant Development                                                   |
| <i>StYAB4</i> | 1024 | 1018 | MYC         | Activates expression of proliferative genes                         |
| <i>StYAB4</i> | 445  | 436  | WUN-motif   | A defense and stress responsive element                             |
| <i>StYAB5</i> | 111  | 117  | Box 4       | Part of conserved DNA module involved in light responsiveness       |
| <i>StYAB5</i> | 895  | 887  | GA-motif    | Part of light responsive element                                    |

|               |     |     |             |                                                                      |
|---------------|-----|-----|-------------|----------------------------------------------------------------------|
| <i>StYAB5</i> | 676 | 682 | MYB         | Plant Development                                                    |
| <i>StYAB5</i> | 69  | 78  | TCA element | cis-acting element involved in salicylic acid responsiveness         |
| <i>StYAB5</i> | 341 | 347 | TGA-Element | Auxin-responsive element                                             |
| <i>StYAB5</i> | 481 | 486 | TGACG-motif | cis-acting regulatory element involved in the MeJA-responsiveness    |
| <i>StYAB6</i> | 1   | 7   | Box 4       | Part of conserved DNA module involved in light responsiveness        |
| <i>StYAB6</i> | 343 | 338 | CGTCA-motif | cis-acting regulatory element involved in the MeJA-responsiveness    |
| <i>StYAB6</i> | 766 | 760 | G-box       | light responsive element                                             |
| <i>StYAB6</i> | 520 | 511 | I-box       | light responsive element                                             |
| <i>StYAB6</i> | 376 | 370 | MYC         | Activates expression of proliferative genes                          |
| <i>StYAB6</i> | 51  | 59  | O2-site     | cis-acting regulatory element involved in zein metabolism regulation |
| <i>StYAB6</i> | 257 | 266 | TCA         | Salicylic acid responsiveness                                        |
| <i>StYAB6</i> | 739 | 745 | TCT-motif   | light responsive element                                             |
| <i>StYAB6</i> | 343 | 348 | TGACG-motif | cis-acting regulatory element involved in MeJA-responsiveness        |
| <i>StYAB7</i> | 982 | 988 | ARE         | Anaerobic induction                                                  |
| <i>StYAB7</i> | 807 | 801 | Box 4       | light responsive element                                             |
| <i>StYAB7</i> | 734 | 728 | MYC         | Activates expression of proliferative genes                          |
| <i>StYAB7</i> | 474 | 463 | O2-site     | cis-acting regulatory element involved in zein metabolism regulation |
| <i>StYAB7</i> | 164 | 169 | STRE        | Stress related function                                              |
| <i>StYAB7</i> | 863 | 853 | TCA         | Salicylic acid responsiveness                                        |
| <i>StYAB7</i> | 398 | 389 | TCA element | Salicylic acid responsiveness                                        |
| <i>StYAB7</i> | 679 | 685 | TGA-Element | Auxin-responsive element                                             |

---

|               |     |     |           |                                                             |
|---------------|-----|-----|-----------|-------------------------------------------------------------|
| <i>StYAB7</i> | 375 | 384 | Circadian | cis-acting regulatory element involved in circadian control |
|---------------|-----|-----|-----------|-------------------------------------------------------------|

---

**Table S2**

*StYAB* genes distribution among groups based on phylogenetic analysis.

| Group<br>s    | Potato                    | Arabidopsis                |                          | Tomato                   |                          | Cultivated Squash             |                          | Cucumber                             |                          |                               |
|---------------|---------------------------|----------------------------|--------------------------|--------------------------|--------------------------|-------------------------------|--------------------------|--------------------------------------|--------------------------|-------------------------------|
|               | NO. of<br>YABB<br>Y genes | Gene-<br>id                | NO. of<br>YABBY<br>genes | Gene-<br>id              | NO. of<br>YABBY<br>genes | Gene-id                       | NO. of<br>YABBY<br>genes | Gene-id                              | NO. of<br>YABBY<br>genes | Gene-id                       |
| INO           | 1                         | StYAB<br>2.                | 1                        | AtINO                    | 1                        | SlYABBY<br>2                  | 2                        | CmYABBY9,<br>CmYABBY10               | 2                        | CsYABBY<br>4,<br>CsYABBY<br>8 |
| YAB2          | 2                         | StYAB<br>7,<br>StYAB<br>5. | 1                        | AtYAB<br>2               | 2                        | SlYABBY<br>6,<br>SlYABBY<br>4 | 2                        | CmYABBY13,<br>CmYABBY6               | 1                        | CsYABBY<br>1                  |
| AFO /<br>YAB3 | 2                         | StYAB<br>4,<br>StYAB<br>3. | 2                        | AtAF<br>O,<br>AtYAB<br>3 | 2                        | SlYABBY<br>5,<br>SlYABBY<br>7 | 3                        | CmYABBY1,<br>CmYABBY2,<br>CmYABBY3   | 2                        | CsYABBY<br>6,<br>CsYABBY<br>7 |
| YAB5          | 2                         | StYAB<br>1,<br>StYAB<br>6. | 1                        | AtYAB<br>5               | 2                        | SlYABBy1<br>,<br>SlYABBY<br>9 | 3                        | CmYABBY4,<br>CmYABBY5,<br>CmYABBY8   | 2                        | CsYABBY<br>2,<br>CsYABBY<br>5 |
| CRC           | 0                         |                            | 1                        | AtCRC                    | 2                        | SlYABBY<br>3,<br>SlYABBY<br>8 | 3                        | CmYABBY7,<br>CmYABBY11,<br>CmYABBY12 | 1                        | CsYABBY<br>3                  |

**Table S3:**

Ka/Ks ratio duplicated gene pairs in potato.

| Gene Id              | Ka       | Ks       | Ka/Ks    | T(MYA)      |
|----------------------|----------|----------|----------|-------------|
| <b>StYAB1-StYAB6</b> | 0.140981 | 0.443162 | 0.318126 | 8.52235E-05 |
| <b>StYAB3-StYAB4</b> | 0.19983  | 1.431631 | 0.139582 | 0.000275314 |
| <b>StYAB5-StYAB7</b> | 0.168917 | 0.612267 | 0.275888 | 0.000117744 |

**Table S4:**

miRNA targets prediction of *StYAB* genes. The miRNA data was downloaded from psRNATarget (Online Web tool).

| miRNA                  | Target Gene   | E-value | Length | Target-start' | Target-end' | miRNA-sequence                 |
|------------------------|---------------|---------|--------|---------------|-------------|--------------------------------|
| <b>stu-miR390-3p</b>   | <i>StYAB7</i> | 4       | 21     | 485           | 505         | CGCUAUCCAUCUUGAGUUUUA          |
| <b>stu-miR5303g</b>    | <i>StYAB4</i> | 4       | 24     | 185           | 209         | AUAUUUUUGAAGAGUC-<br>UGAGCAAC  |
| <b>stu-miR5303i</b>    | <i>StYAB4</i> | 4       | 24     | 185           | 209         | AUAUUUUUGAAGAGUC-<br>UGAGCAAC  |
| <b>stu-miR172d-5p</b>  | <i>StYAB3</i> | 4.5     | 21     | 343           | 362         | GGAGCAUCAUCAAGAUUCACA          |
| <b>stu-miR5303h</b>    | <i>StYAB4</i> | 4.5     | 24     | 186           | 210         | AACAUUUUUUGAAGAGUC-<br>UGAGCAA |
| <b>stu-miR1886g-5p</b> | <i>StYAB7</i> | 5       | 24     | 448           | 471         | GAGAUGAGAUCAAUGUUUGGACAU       |
| <b>stu-miR1886g-5p</b> | <i>StYAB4</i> | 5       | 24     | 681           | 703         | GAGAUGAGAUCAAUGUUUGGACAU       |

|                       |               |   |    |     |     |                               |
|-----------------------|---------------|---|----|-----|-----|-------------------------------|
| <b>stu-miR5303j</b>   | <i>StYAB4</i> | 5 | 24 | 186 | 210 | AAUAUUUUUGAAGAGUC-<br>UGAGCAA |
| <b>stu-miR7992-5p</b> | <i>StYAB6</i> | 5 | 24 | 540 | 563 | UUUGACAAUGCACAUUAGACACU       |
| <b>stu-miR8037</b>    | <i>StYAB5</i> | 5 | 22 | 280 | 301 | AUAAUUUGGAGGAUAGGAACC         |

Figure S1:

The sequence logos are based on alignments of *StYAB* gnese. *YABBY* domain is highly conserved across all *StYAB* genes while C2-C2 domain is highly conserved in only six *YABBY* proteins (*StYAB1*, *StYAB3*, *StYAB4*, *StYAB5*, *StYAB6*, *StYAB7*). Black bars representing start and end point of C2-C2 type domain & *YABBY* domain. Single alphabet on the respective number representing the highly conserve nature of that respective amino acid in s all *StYAB* genes sequence.

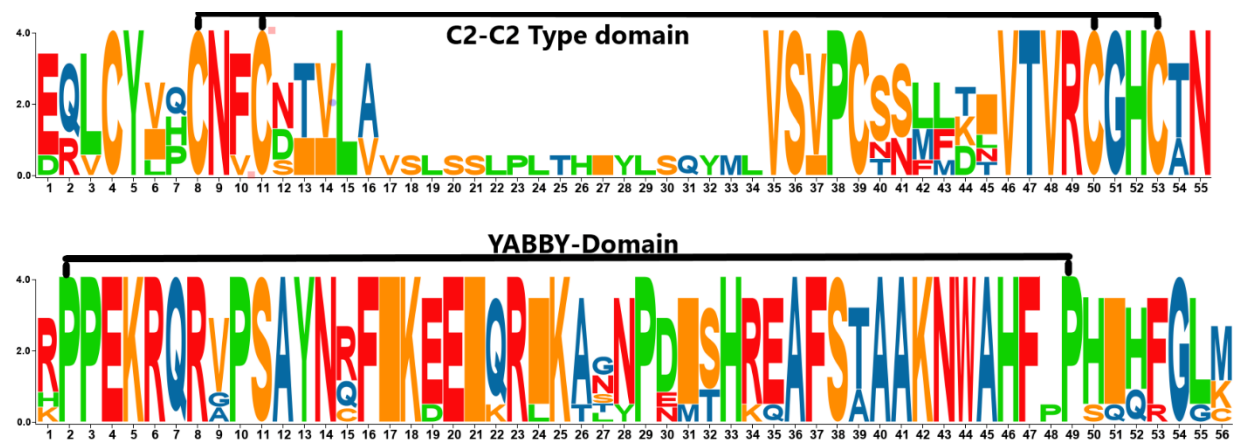

Figure S2:

Heat Map representing sub-cellular localization of all seven *StYAB* genes. Grey color represents absence of respective genes in that cell region. White and Red color represents minimum and maximum value of gene in that region.

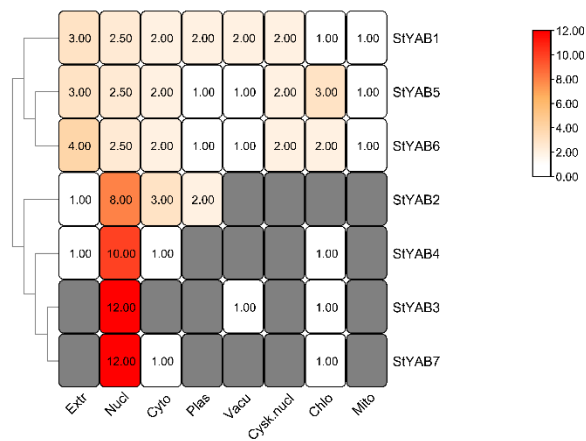

Figure S3:

*YABBY* genes distribution chart representing, total number of *YABBY* genes from different species in 5 sub-groups based on phylogenetic analysis.

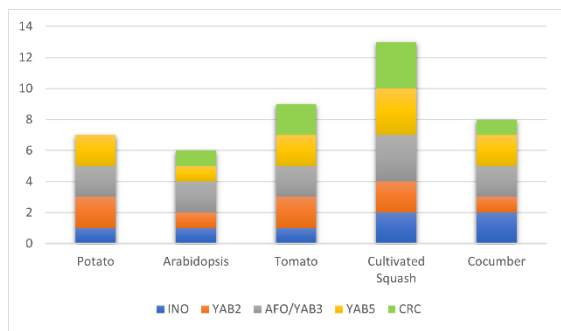



Figure S4:

Distribution of *StYAB* genes on potato chromosomes, lines predicting the possible gene duplication on different chromosomes.

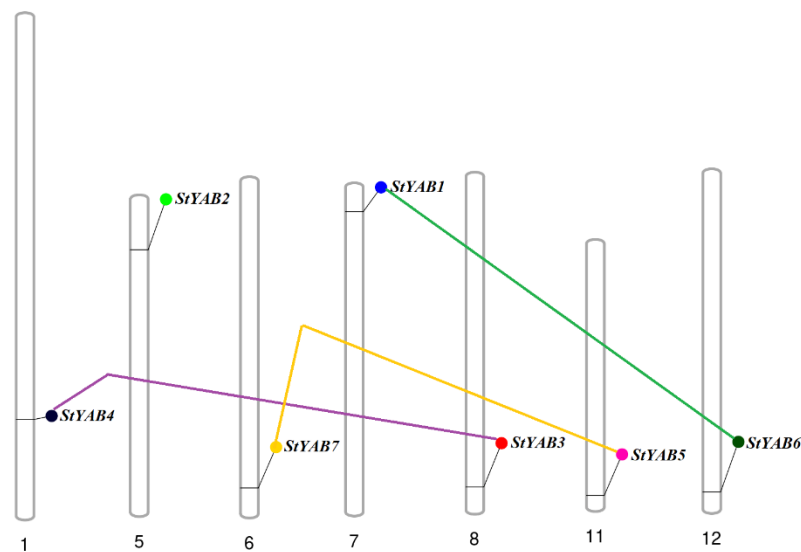

Figure S5:

Fold Enrichment chart representing the overlapping *StYAB* genes functions. Bigger lollipop tip size represents the more no. of genes involved in that process and vice versa for small tip size.

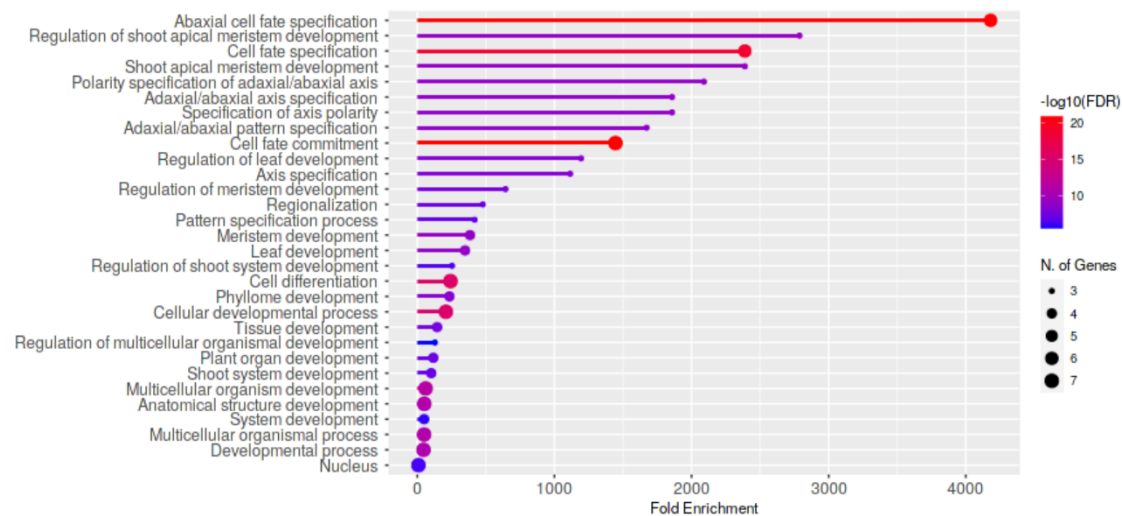

Heat map shows the expression profile of the *StYAB* genes in leaves and Roots of potato cultivar under different levels of Cadmium stress i.e., Control= 0mg per kg, T1= 1mg per kg and T2= 5mg per kg).

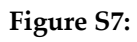

Heatmap showing the expression of SIYAB3, SIYAB6, SIYAB5, and SIYAB7 across eight conditions. The color scale ranges from 0.00 (green) to 14.00 (red). SIYAB3 and SIYAB6 show low expression (green) across all conditions. SIYAB5 shows moderate expression (pink) across all conditions. SIYAB7 shows high expression (red) in the first four conditions (Dormant 1-4) and moderate expression (pink) in the last four conditions (Non-Dormant 1-4).

Figure S8:

Heat map shows the expression profile of the *StYAB* genes in leaves of four different potato cultivars under drought stress.

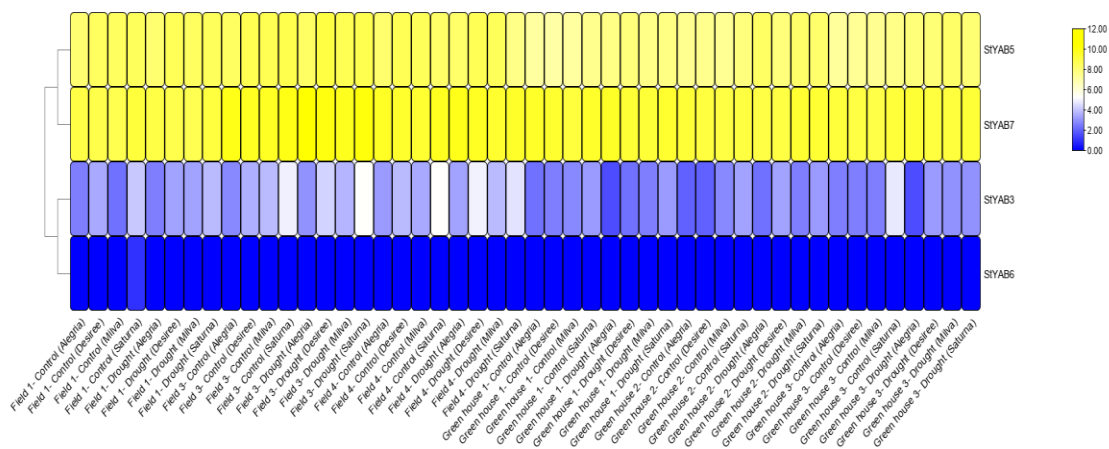

Figure S9:

Heat map shows the expression profile of the *StYAB* genes in petiole of potato cultivars under different photoperiod.

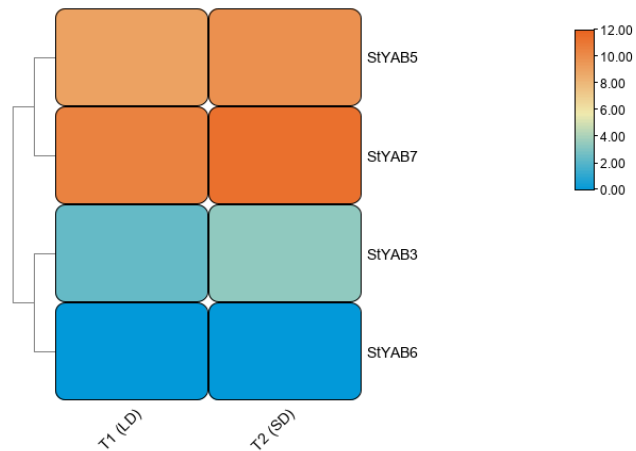

Heat map shows the expression profile of the *StYAB* genes in phloem associated cells of petiole and lower stem of potato cultivar.

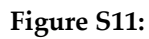[illegible]
